# Supplementary material for: An unusual 3D 8-connected entangled coordination network with coexistence of self-threading, polythreading and interpenetration
Source: Royal Society of Chemistry journal article supplement (doi:10.1039/c3ce41727a), 2013-01-01
Supplement: c3ce41727a.pdf [file c3ce41727a.pdf]

**Electronic Supplementary Information for MS:**

**An unusual 8-connected entangled coordination network: coexistence of polythreading, self-threading and interpenetration based on 3D motifs**

Juan Yang,<sup>a</sup> Junliang Liu,<sup>b</sup> Xin Wang,<sup>a</sup> Xiaolin Chi,<sup>a</sup> Jinling Zhang,<sup>a</sup> Huayi Zhang,<sup>a</sup> Qunli Luo\*<sup>a</sup> and Dongrong Xiao\*<sup>a</sup>

<sup>a</sup> *College of Chemistry and Chemical Engineering, Southwest University, Chongqing, 400715, P. R. China. E-mail: xiaodr98@swu.edu.cn; [qlluo@swu.edu.cn](mailto:qlluo@swu.edu.cn)*

<sup>b</sup> *Key Laboratory of Bioinorganic and Synthetic Chemistry of Ministry of Education / State Key Laboratory of Optoelectronic Materials and Technologies, School of Chemistry and Chemical Engineering, Sun Yat-Sen University, Guangzhou 510275, P. R. China*

## Experimental section

### Materials and general methods

All chemicals were commercially purchased and used without further purification. Elemental analyses (C, H and N) were performed on a Perkin-Elmer 2400 CHN Elemental Analyzer. Co was determined by a tps-7000 Plasma-Spec (I) inductively coupled plasma atomic emission spectrometer (ICP-AES). IR spectra were recorded in the range 400-4000  $\text{cm}^{-1}$  on a Bio-Rad FTS-185 FT/IR Spectrophotometer using KBr pellets. TG analyses were performed on a NETZSCH STA 449C instrument in flowing  $\text{N}_2$  with a heating rate of 10  $^\circ\text{C}\cdot\text{min}^{-1}$ . XRPD data were recorded on a XD-3 diffractometer using Cu  $\text{K}\alpha$  radiation. Variable-temperature magnetic susceptibility data were obtained on a SQUID magnetometer (Quantum Design, MPMS-7) in the temperature range of 2-300 K with an applied field of 1.0 kOe.

**Synthesis of  $[\text{Co}(\text{tpba})_2]$  (**1**).** A mixture of  $\text{CoCl}_2\cdot 6\text{H}_2\text{O}$  (0.4 mmol), Htpba (0.2 mmol), NaOH solution (0.5 mL, 2 M) and distilled water (9 mL) and methanol (1 mL) was stirred for about 15 min in air, then transferred and sealed in an 18 mL Teflon-lined autoclave, which was heated at 170  $^\circ\text{C}$  for 72 h. After slow cooling to the room temperature, purple block crystals of **1** were obtained (yield: 79% based on Htpba). Elemental analysis (%) calcd for  $\text{C}_{44}\text{H}_{28}\text{CoN}_6\text{O}_4$ : C, 69.20, H, 3.70, Co, 7.72, N, 11.00. found: C, 68.96, H, 3.52, Co, 7.93, N, 11.24 %. IR (KBr pellet): 3314(m), 3195(m), 3070(m), 3029(m), 1591(s), 1547(s), 1406(s), 1316(w), 1231(w), 1212(w), 1181(w), 1101(w), 1062(m), 1015(m), 992(m), 888(w), 860(w), 822(s), 784(s), 747(w), 696(s), 668(w), 649(w), 621(m), 563(w), 517(m), 476(m).

## Crystallographic Data Collection and Refinement

Suitable single crystals of **1** were selected for single-crystal X-ray diffraction analysis on a Bruker Smart Apex CCD diffractometer with Mo K $\alpha$  monochromated radiation ( $\lambda = 0.71073 \text{ \AA}$ ) at 293 K. Absorption corrections were applied using the multi-scan technique. The structure of **1** was solved by the direct method and refined by the full-matrix least-squares method on  $F^2$  using the SHELXTL-97 software.<sup>1</sup> All of the non-hydrogen atoms were refined anisotropically. The hydrogen atoms attached to carbon atoms were generated geometrically. Selected bond lengths for compound **1** are listed in Table S1.

CCDC 935239 contains the supplementary crystallographic data for this paper. These data can be obtained free of charge via <http://www.ccdc.cam.ac.uk/conts/retrieving.html> (or from the Cambridge Crystallographic Data Centre, 12, Union Road, Cambridge CB2 1EZ, UK; fax: +44 1223 336033).

## Reference

- 1 (a) G. M. Sheldrick, *SHELXS 97, Program for Crystal Structure Solution*, University of Göttingen, Germany, 1997; (b) G. M. Sheldrick, *SHELXTL 97, Program for Crystal Structure Refinement*, University of Göttingen, Germany, 1997.

**Table S1.** Selected bond lengths [Å] and angles [°] for compound **1**.

|                     |           |                     |            |
|---------------------|-----------|---------------------|------------|
| Co(1)-O(2)#1        | 1.984(2)  | Co(1)-O(1)          | 2.045(2)   |
| Co(1)-O(3)#2        | 2.132(2)  | Co(1)-N(1)          | 2.144(3)   |
| Co(1)-N(4)#3        | 2.156(3)  | Co(1)-O(4)#2        | 2.278(2)   |
| N(4)-Co(1)#4        | 2.156(3)  | O(2)-Co(1)#1        | 1.984(2)   |
| O(3)-Co(1)#5        | 2.132(2)  | O(4)-Co(1)#5        | 2.278(2)   |
| O(2)#1-Co(1)-O(1)   | 113.31(9) | O(2)#1-Co(1)-O(3)#2 | 149.52(10) |
| O(1)-Co(1)-O(3)#2   | 97.17(9)  | O(2)#1-Co(1)-N(1)   | 89.68(10)  |
| O(1)-Co(1)-N(1)     | 87.88(10) | O(3)#2-Co(1)-N(1)   | 91.61(10)  |
| O(2)#1-Co(1)-N(4)#3 | 90.54(10) | O(1)-Co(1)-N(4)#3   | 91.44(10)  |
| O(3)#2-Co(1)-N(4)#3 | 88.53(10) | N(1)-Co(1)-N(4)#3   | 179.32(12) |
| O(2)#1-Co(1)-O(4)#2 | 90.32(9)  | O(1)-Co(1)-O(4)#2   | 156.34(9)  |
| O(3)#2-Co(1)-O(4)#2 | 59.21(9)  | N(1)-Co(1)-O(4)#2   | 91.15(10)  |
| N(4)#3-Co(1)-O(4)#2 | 89.50(10) |                     |            |

Symmetry transformations used to generate equivalent atoms: #1 -x, -y, -z+1; #2 -x-1, y+1/2, -z+3/2; #3 x+1, -y+1/2, z+1/2; #4 x-1, -y+1/2, z-1/2; #5 -x-1, y-1/2, -z+3/2.

## Supporting Figures

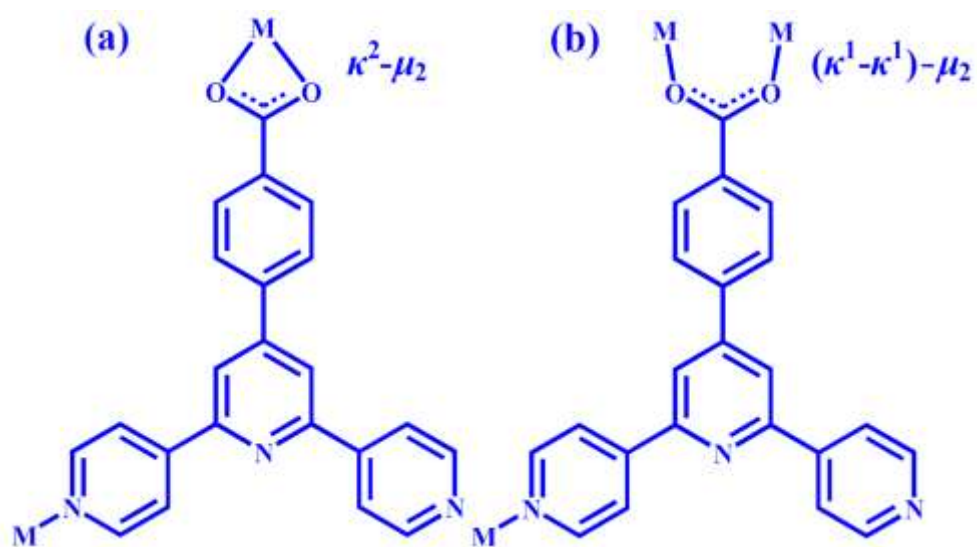

**Scheme S1.** The different coordination modes of tpba ligands in **1**.

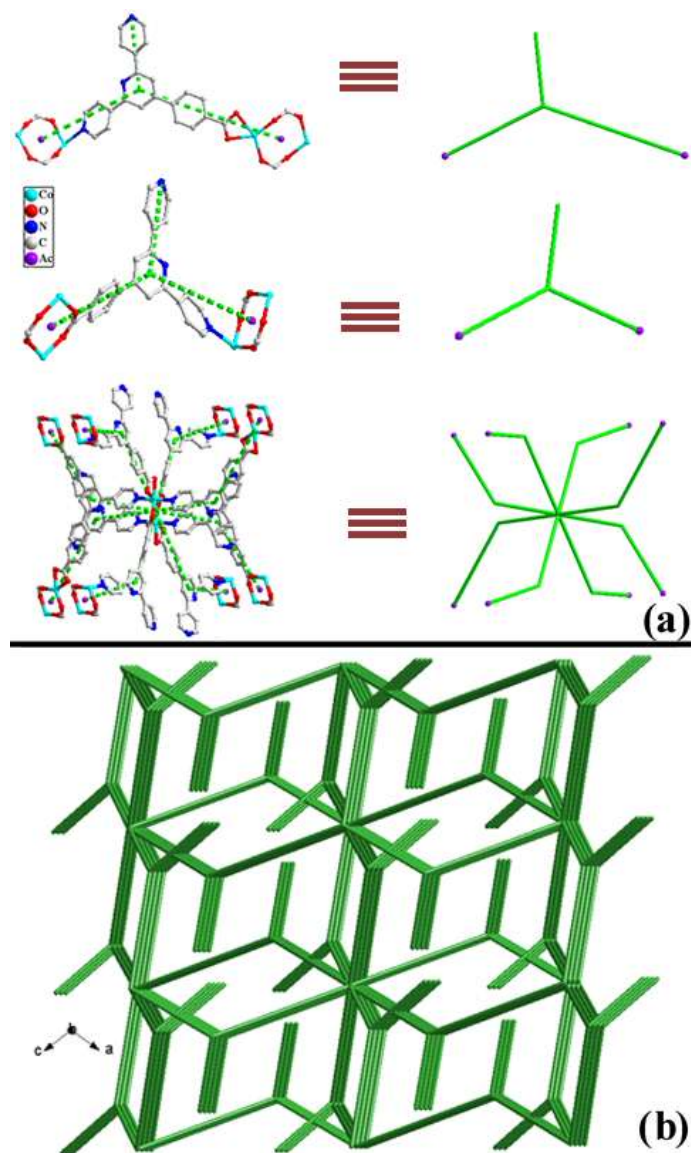

**Fig. S1.** (a) Perspective and simplified views of the eight-connected SBU center and two types of linkers (tpba ligands) involving dangling arms in **1** (the arms in eight-connected SBU center are omitted for clarity). (b) Schematic representation of the single 8-connected self-threading framework of **1**.

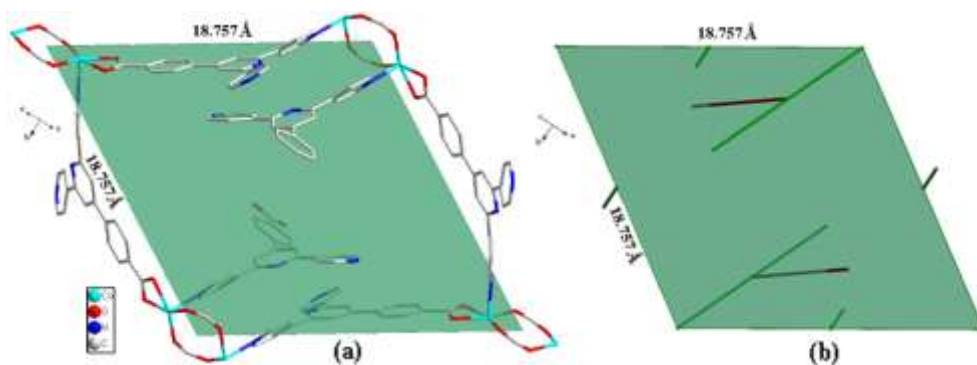

**Fig. S2.** The detail of self-threading character in **1**. The tetragonal window  $[\text{Co}_8(\text{tpba})_4(\text{CO}_2)_8]$  with approximately dimensions of  $18.757 \times 18.757 \text{ \AA}$  is highlighted by green and the self-threading arms are highlighted by purple lines.

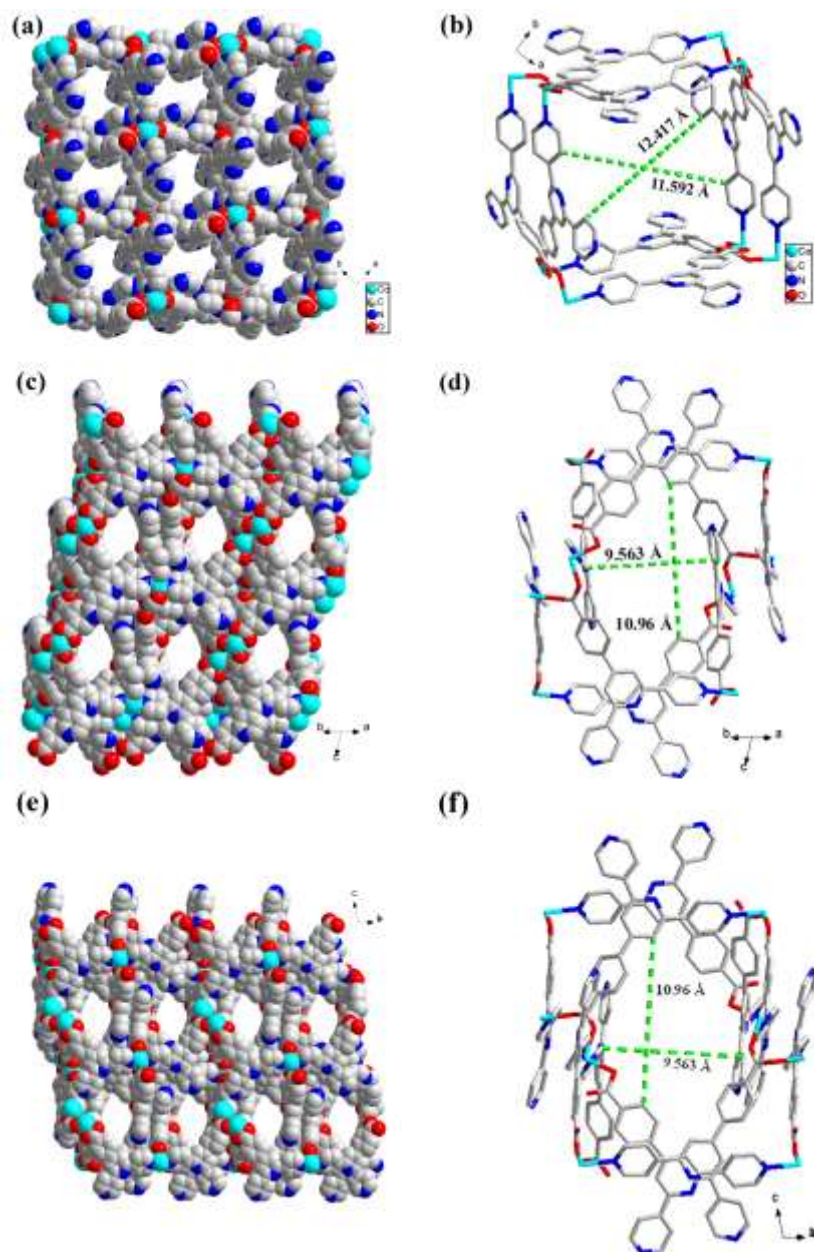

**Fig. S3.** Space-filling and perspective views of an individual 3D self-threading framework of **1** in three-directional open channels of approximately  $12.417 \times 11.592$  Å along the [0 0 1] direction (a and b), of  $10.96 \times 9.563$  Å along the [2 1 0] direction (c and d) and of  $10.96 \times 9.563$  Å along the  $[2\bar{1}0]$  direction (e and f).



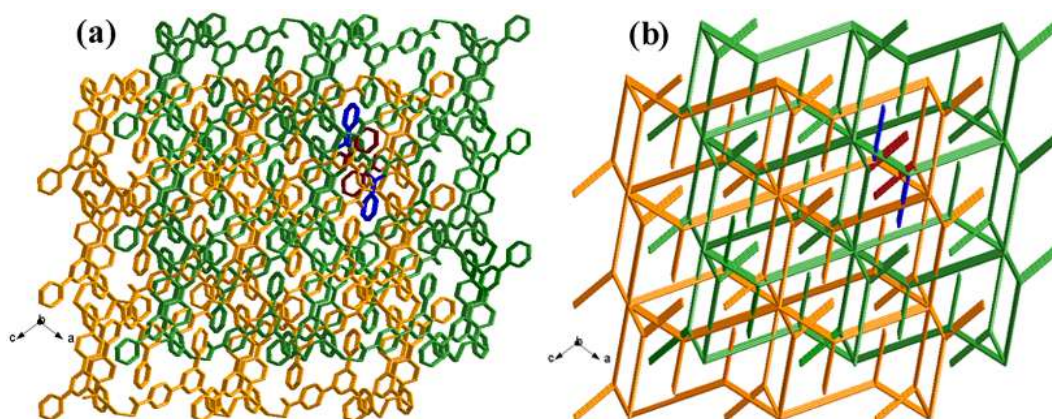

**Fig. S4.** Perspective (a) and schematic (b) views of the self-threading and polythreading features in the 2-fold interpenetrating framework of **1**. The polythreading and self-threading arms are highlighted by blue and purple lines.

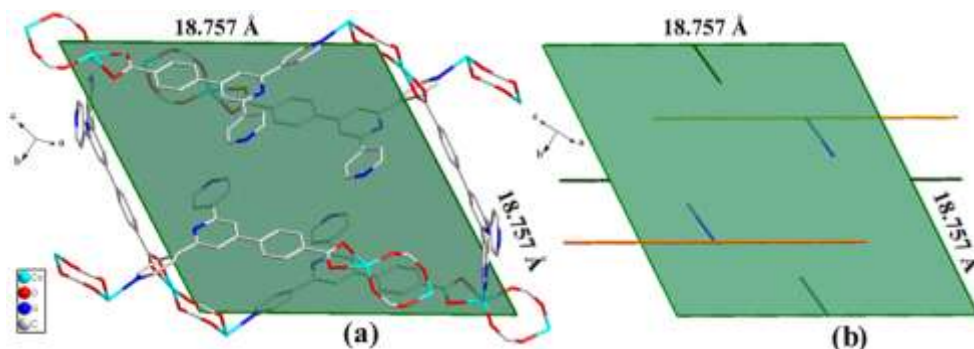

**Fig. S5.** The detail of polythreading character in **1**. The tetragonal window  $[\text{Co}_8(\text{tpba})_4(\text{CO}_2)_8]$  with approximately dimensions of  $18.757 \times 18.757 \text{ \AA}$  is highlighted by green and the polythreading arms are highlighted by blue lines.

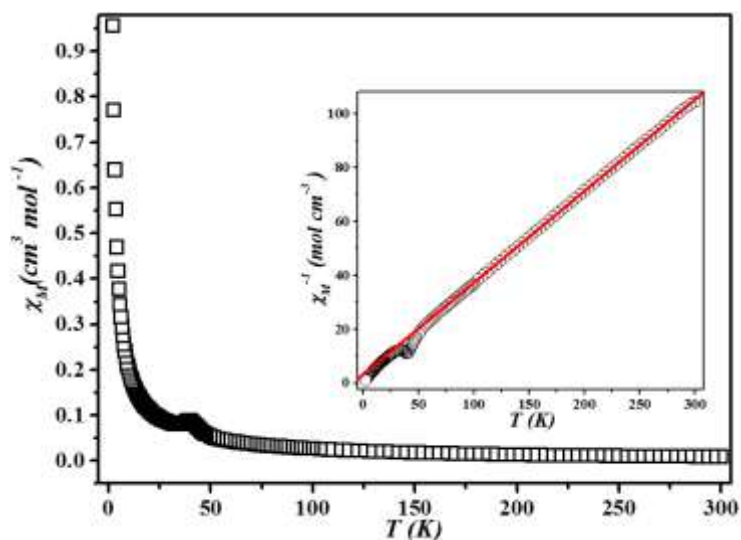

**Fig. S6.** Temperature dependence of the magnetic susceptibility  $\chi_M$  for compound **1**.  
Insert: Temperature dependence of  $\chi_M^{-1}$  for compound **1**.

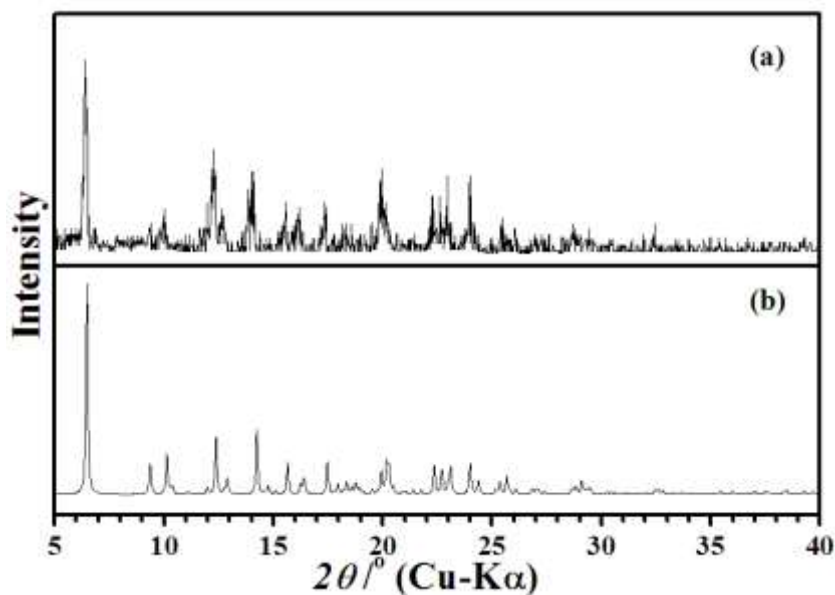

**Fig. S7.** The XRPD patterns for: (a) as-synthesized samples of **1**, and (b) simulated one based on the single-crystal structure of **1**.

The peak positions of simulated and experimental XRPD patterns are in agreement with each other, indicating the good phase purity of compound **1**. The differences in intensity may be due to the preferred orientation of the crystalline powder sample

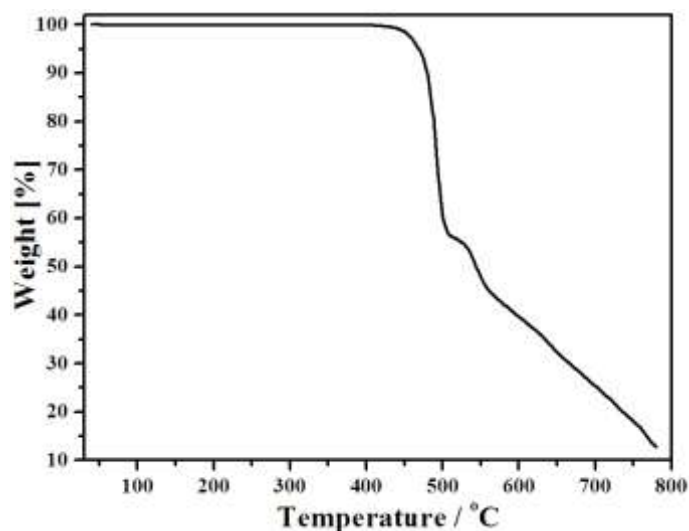

**Fig. S8.** The TG curves of compound **1**.

The TG curves of **1** display two steps of weight losses (Fig. S8). The first weight loss is 44.04% from 400 to 516 °C and the second weight loss is 43.21% from 516 to 780 °C, both corresponding to the loss of tpba ligand. The total weight loss of 87.25% is slightly less than the calculated value of 90.20%, if the final product is assumed to be CoO, which indicates that the decomposing process is not complete due to the use of nitrogen protection.

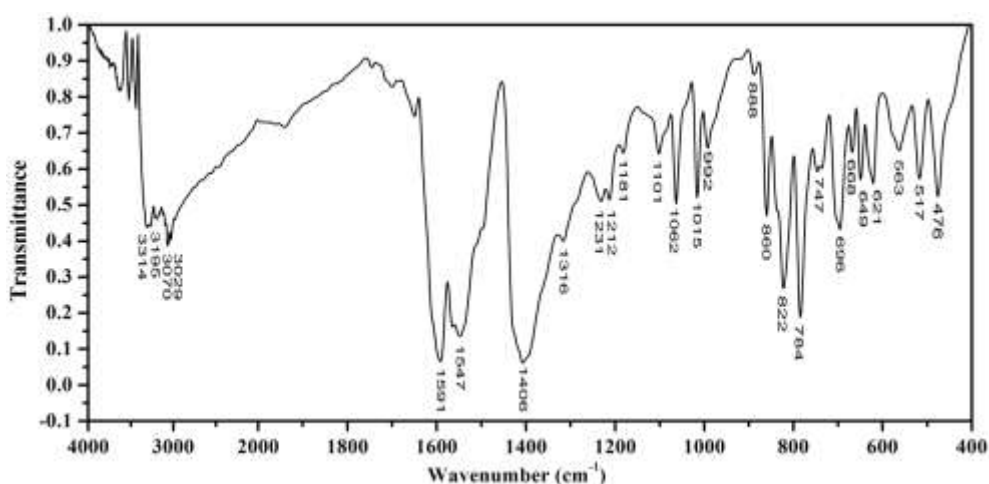

**Fig. S9.** The IR spectrum for compound **1**. IR (KBr pellet): 3314(m), 3195(m), 3070(m), 3029(m), 1591(s), 1547(s), 1406(s), 1316(w), 1231(w), 1212(w), 1181(w), 1101(w), 1062(m), 1015(m), 992(m), 888(w), 860(w), 822(s), 784(s), 747(w), 696(s), 668(w), 649(w), 621(m), 563(w), 517(m), 476(m).

The characteristic bands of the carboxylate groups in compound **1** are clearly shown in the IR spectrum (Fig. S9), which are at 1591 and 1547  $\text{cm}^{-1}$  for the antisymmetric stretching and 1406  $\text{cm}^{-1}$  for symmetric stretching.
